# Supplementary material for: Crohn’s disease complicated with intestinal fistulas: Exclusive enteral nutrition or Biologics?
Source: Research Square preprint supplement (doi:10.21203/rs.3.rs-7418997/v1), 2025-09-02
Supplement: Supplementary file 1 [file 74b5b42c9f64b6ea6160d4e6.docx]

**Supplementary Table 1**. Univariable and Multivariable Logistic Regression Analyses of clinical remission.

| Characteristics | Univariable analysis | *P* | Multivariable analysis | *P* |
| --- | --- | --- | --- | --- |
|  | OR (95%CI) |  | OR (95%CI) |  |
| Investigated drugs | 1.78 (0.83-3.85) | **0.140** | 0.80 (0.30-2.12) | 0.650 |
| Sex | 0.77 (0.34-1.74) | 0.530 |  |  |
| Age at diagnosis | 1.00 (0.96-1.04) | 0.992 |  |  |
| Course of disease | 1.00 (0.99-1.01) | 0.691 |  |  |
| Disease location | 0.69 (0.18-2.74) | 0.602 |  |  |
| Upper gastrointestinal involvement | 1.13 (0.53-2.42) | 0.754 |  |  |
| Complex fistula | 0.46 (0.15-1.41) | **0.173** | 0.49 (0.13-1.82) | 0.285 |
| Previous intestinal surgery | 0.46 (0.19-1.16) | **0.099** | 0.41 (0.15-1.11) | 0.079 |
| HBI at baseline | 0.74 (0.61-0.91) | **0.003** | 0.75 (0.60-0.93) | **0.010** |
| CRP (mg/L) | 0.99 (0.98-1.00) | **0.148** | 1.00 (0.99-1.02) | 0.825 |
| ESR (mm/h) | 0.99 (0.98-1.01) | 0.438 |  |  |
| BMI (kg/m2) | 1.19 (1.02-1.38) | **0.026** | 1.12 (0.93-1.35) | 0.221 |
| ALB (g/L) | 1.08 (1.01-1.16) | **0.019** | 1.05 (0.97-1.14) | 0.224 |
| HGB (g/L) | 1.02 (1.00-1.03) | **0.091** | 1.00 (0.98-1.02) | 0.946 |

Note: Variables associated with clinical remission with a *P* <0.20 on univariable analysis were included in the multivariable analysis. EEN, exclusive enteral nutrition; BMI, body mass index; HBI, Harvey-Bradshaw Index; CRP, C-reactive protein; ESR, erythrocyte sedimentation rate; HGB, hemoglobin; ALB, albumin; CI, Confidence interval; OR, odds ratio.

**Supplementary Table 2.** The baseline characteristics of CD patients between the UST group and the EEN group.

| Characteristics | UST (n = 27) | EEN (n = 61) | *P* |
| --- | --- | --- | --- |
| Male, n (%) | 20 (74.1) | 40 (65.6) | 0.430 |
| Disease duration (months, median [IQR]) | 56.0 (21.0, 98.0) | 52.0 (13.0, 97.0) | 0.721 |
| Age at diagnosis (years, median [IQR]) | 27.0 (20.0, 34.0) | 30.0 (25.5, 35.0) | 0.088 |
| Montreal classification, n (%) |  |  | 1.000 |
| Age at diagnosis |  |  |  |
| 0–16 years old (A1) | 0 (0.0) | 1 (1.6) |  |
| 17–40 years old (A2) | 23 (85.2) | 51 (83.6) |  |
| > 40 years old (A3) | 4 (14.8) | 9 (14.8) |  |
| Disease location |  |  |  |
| Ileal (L1) | 2 (7.4) | 7 (11.5) | 0.842 |
| Ileocolonic (L3) | 25 (92.6) | 54 (88.5) |  |
| Upper gastrointestinal involvement | 14 (51.9) | 26 (42.6) | 0.423 |
| Perianal lesions | 20 (74.1) | 44 (72.1) | 0.850 |
| Previous medication history, n (%) | 24 (88.9) | 28 (45.9) | **< 0.001** |
| Corticosteroids, n (%) | 9 (33.3) | 16 (26.2) | 0.496 |
| EEN, n (%) | 20 (74.1) | 4 (6.6) | **< 0.001** |
| Immunomodulators, n (%) | 16 (59.3) | 17 (27.9) | **0.005** |
| Biologics, n (%) | 17 (63.0) | 7 (11.5) | **< 0.001** |
| Previous surgery history, n (%) | 13 (48.1) | 30 (49.2) | 0.929 |
| Previous perianal surgery, n (%) | 7 (25.9) | 18 (29.5) | 0.731 |
| Previous intestinal surgery, n (%) | 7 (25.9) | 14 (23.0) | 0.763 |
| Classification of fistula tract, n (%) |  |  | **0.041** |
| simple fistula | 26 (96.3) | 46 (75.4) |  |
| complex fistula | 1 (3.7) | 15 (24.6) |  |
| Type of fistulas, n/N (%) |  |  | **0.023** |
| Enteric fistula | 27/28 (96.4) | 56/76 (73.7) |  |
| Enterocutaneous fistula | 0/28 (0.0) | 11/76 (14.5) |  |
| Vesical fistula | 1/28 (3.6) | 9/76 (11.8) |  |
| HBI at baseline (median [IQR]) | 5.0 (5.0, 7.0) | 8.0 (6.0, 9.0) | **0.002** |
| Disease activity, n (%) |  |  | **0.012** |
| mild activity | 21 (77.8) | 28 (45.9) |  |
| moderate activity | 6 (22.2) | 32 (52.5) |  |
| severe activity | 0 (0.0) | 1 (1.6) |  |

Values are presented as numbers (%).

EEN, exclusive enteral nutrition; IQR, interquartile range; HBI, Harvey-Bradshaw Index HBI.

**Supplementary Table 3.** The baseline characteristics of CD patients between the IFX group and the EEN group.

| Characteristics | IFX (n = 20) | EEN (n = 61) | *P* |
| --- | --- | --- | --- |
| Male, n (%) | 13 (65.0) | 40 (65.6) | 0.963 |
| Disease duration (months, median [IQR]) | 65.0 (35.0, 108.8) | 52.0 (13.0, 97.0) | 0.437 |
| Age at diagnosis (years, median [IQR]) | 24.5 (21.5, 34.8) | 30.0 (25.5, 35.0) | 0.185 |
| Montreal classification, n (%) |  |  | 0.068 |
| Age at diagnosis |  |  |  |
| 0–16 years old (A1) | 3 (15.0) | 1 (1.6) |  |
| 17–40 years old (A2) | 14 (70.0) | 51 (83.6) |  |
| > 40 years old (A3) | 3 (15.0) | 9 (14.8) |  |
| Disease location |  |  |  |
| Ileal (L1) | 0 (0.0) | 7 (11.5) | 0.260 |
| Ileocolonic (L3) | 20 (100.0) | 54 (88.5) |  |
| Upper gastrointestinal involvement | 7 (35.0) | 26 (42.6) | 0.547 |
| Perianal lesions | 18 (90.0) | 44 (72.1) | 0.183 |
| Previous medication history, n (%) | 13 (65.0) | 28 (45.9) | 0.138 |
| Corticosteroids, n (%) | 8 (40.0) | 16 (26.2) | 0.242 |
| EEN, n (%) | 8 (40.0) | 4 (6.6) | **0.001** |
| Immunomodulators, n (%) | 9 (45.0) | 17 (27.9) | 0.154 |
| Biologics, n (%) | 2 (10.0) | 7 (11.5) | 1.000 |
| Previous surgery history, n (%) | 12 (60.0) | 30 (49.2) | 0.401 |
| Previous perianal surgery, n (%) | 9 (45.0) | 18 (29.5) | 0.202 |
| Previous intestinal surgery, n (%) | 6 (30.0) | 14 (23.0) | 0.737 |
| Classification of fistula tract, n (%), |  |  | **0.034** |
| simple fistula | 20 (100.0) | 46 (75.4) |  |
| complex fistula | 0 (0.0) | 15 (24.6) |  |
| Type of fistulas, n/N (%) |  |  | 0.274 |
| Enteric fistula | 18/20 (90.0) | 56/76 (73.7) |  |
| Enterocutaneous fistula | 2/20 (10.0) | 11/76 (14.5) |  |
| Vesical fistula | 0/20 (0.0) | 9/76 (11.8) |  |
| HBI at baseline (median [IQR]) | 6.0 (5, 7.8) | 8.0 (6.0, 9.0) | **0.028** |
| Disease activity, n (%) |  |  | 0.060 |
| mild activity | 15 (75.0) | 28 (45.9) |  |
| moderate activity | 5 (25.0) | 32 (52.5) |  |
| severe activity | 0 (0.0) | 1 (1.6) |  |

Values are presented as numbers (%).

EEN, exclusive enteral nutrition; IQR, interquartile range; HBI, Harvey-Bradshaw Index HBI.

**Supplementary Table 4.** Comparative Outcome measures between the UST group and the EEN group.

| Outcomes, n (%) | UST | EEN | *P* | OR | 95% CI |
| --- | --- | --- | --- | --- | --- |
| Clinical remission | 16 (59.3) | 25 (41.0) | 0.113 | 2.10 | 0.83-5.27 |
| Clinical response | 17 (63.0) | 39 (63.9) | 0.930 | 0.96 | 0.38-2.45 |
| Fistula healing | 1 (3.7) | 14 (23.0) | 0.057 | 0.13 | 0.02-1.04 |
| Transmural healing | 0 (0.0) | 8 (13.1) | 0.116 | 0.87 | 0.79-0.96 |
| Radiological response | 17 (63.0) | 57 (93.4) | **0.001** | 0.12 | 0.03-0.43 |
| Endoscopic response, n/N (%) | 10/18 (55.6) | 29/38 (76.3) | 0.115 | 0.39 | 0.12-1.28 |
| Endoscopic remission, n/N (%) | 6/18 (33.3) | 21/38 (55.3) | 0.125 | 0.41 | 0.13-1.30 |
| CRP normalization | 15 (55.6) | 45 (73.8) | 0.091 | 0.44 | 0.17-1.15 |

EEN, exclusive enteral nutrition; UST, ustekinumab; CRP, C-reactive protein; CI, Confidence interval; OR, odds ratio.

**Supplementary Table 5.** Comparative Outcome measures between the IFX group and the EEN group.

| Outcomes, n (%) | IFX | EEN | *P* | OR | 95% CI |
| --- | --- | --- | --- | --- | --- |
| Clinical remission | 10 (50.0) | 25 (41.0) | 0.480 | 1.44 | 0.52-3.97 |
| Clinical response | 12 (60.0) | 39(63.9) | 0.752 | 0.85 | 0.30-2.39 |
| Fistula healing | 2 (10.0) | 14 (23.0) | 0.348 | 0.37 | 0.08-1.81 |
| Transmural healing | 3 (15.0) | 8(13.1) | 1.000 | 1.17 | 0.28-4.91 |
| Radiological response | 15 (75.0) | 57(93.4) | 0.062 | 0.21 | 0.05-0.88 |
| Endoscopic response, n/N (%) | 12/17 (70.6) | 29/38 (76.3) | 0.908 | 0.75 | 0.21-2.69 |
| Endoscopic remission, n/N (%) | 8/17 (47.1) | 21/38 (55.3) | 0.573 | 0.72 | 0.23-2.27 |
| CRP normalization, n/N (%) | 11 (55.0) | 45 (73.8) | 0.115 | 0.44 | 0.15-1.24 |

EEN, exclusive enteral nutrition; IFX, infliximab; CRP, C-reactive protein; CI, Confidence interval; OR, odds ratio.
